# Supplementary material for: Altered Phenotype and Gene Expression of Regulatory T cells (Tregs) in Children with Autism, and the Relationship with Comorbid Gastrointestinal Symptoms
Source: Research Square preprint supplement (doi:10.21203/rs.3.rs-8080761/v1), 2025-11-18
Supplement: Supplementary file 2 [file c69ca849598345d1251b4fb8.docx]

| Table 1. Participant demographic information | | | |
| --- | --- | --- | --- |
|  | **ASD-NoGI** | **ASD-GI** | **TD** |
| N | 24 | 12 | 18 |
| Age, years (average) | 7.40 | 8.10 | 7.54 |
| Sex (F/M) | (5/19) | (3/9) | (2/16) |
| Autism Diagnostic Observation Schedule (mean, SD) |  |  |  |
| Social Affect | 13.8(4.1) | 9(2.2) | - |
| Restrictive and Repetitive Behaviors | 4(1.6) | 3.3(1.1) | - |
| Severity Score | 7.7(1.5) | 6.2(1) | - |
| Autism Diagnostic Interview-Revised (mean, SD) |  |  |  |
| Social Interaction | 16.8(5) | 16.8(4.4) | - |
| Verbal Communication | 12.7(3) | 16.9(3) | - |
| Non-Verbal Communication | 10.4(2.1) | 9.5(3.5) | - |
| Stereotyped Behaviors | 6.6(2.6) | 6.4(2.1) | - |
| Total Score | 4.4(0.7) | 3.9(0.9) | - |
| Mullen Scales of Early Learning, T-score (mean, SD) |  |  |  |
| Visual Reception | 36.6(16.1) | 43.2(13.7) | 55.3(12.3) |
| Fine Motor | 34.5(14.8) | 36.8(12.9) | 57(15.8) |
| Receptive Language | 29.5(11.2) | 34.3(12.5) | 51.1(10.2) |
| Expressive Language | 28.7(9.9) | 34.9(8.8) | 49.6(12.4) |
| Early Learning Composite | 70(19.3) | 77.6(19.1) | 106.5(19.8) |
| Aberrant Behavior Checklist (mean, SD) |  |  |  |
| Irritability | 14(9) | 10(8) | 4(4) |
| Lethargy | 11(8) | 8(7) | 3(4) |
| Stereotypy | 5(4) | 4(4) | 2(2) |
| Hyperactivity | 10(9) | 7(6) | 3(4) |
| Inappropriate Speech | 2(2) | 2(2) | 1(1) |
| Current CHARGE GI History (median, IQR) | |  |  |
| Abdominal Pain | 0(1) | 1(1) | 0(0.25) |
| Gas/Bloating | 0(1) | 1(1) | 0(0.25) |
| Diarrhea | 0(1) | 0.5(1) | 0(1) |
| Constipation | 0(1) | 1(1) | 0(0) |
| Pain on Stooling | 0(0.25) | 1(1.25) | 0(0) |
| Vomiting | 0(0) | 0(0) | 0(0) |
| Sensitivity to Foods | 0(0.25) | 0(1.25) | 0(0) |
| Difficulty Swallowing | 0(0) | 0(0) | 0(0) |
| Blood in Stool | 0(0) | 0(0) | 0(0) |
| Blood in Vomit | 0(0) | 0(0) | 0(0) |

| | Table 2. CD3+CD4+ Peripheral Blood Mononuclear Cell Frequencies in children with ASD with or without GI symptoms [mean (SD)] | | | | | --- | --- | --- | --- | |  | **TD** | **ASD-NoGI** | **ASD-GI** | | CD45RA+ | 70.1(8.3) | 72.3(6.1) | 65.4(11) | | CD45RA+Foxp3+ | 47.1(22.3) | 56.9(10.7) | 50.1(7.3) | | Foxp3+ | 6.4(1.8) | 6.3(1.9) | 6.6(1.6) | | α4β7+ | 4.7(1.9) | **3.1(1.5)*** | **4.6(1.2)^** | | α4β7+Foxp3+ | 4.7(1.6) | 4.4(3.4) | 5.1(2.5) | | α4β7+CCR9+Foxp3+ | 1.9(0.8) | 1.8(1.9) | 1.7(0.8) | | CCR9+ | 7.9(1.4) | 7.8(2.8) | 7.9(1.9) | |
| --- | --- | --- | --- | --- | --- | --- | --- | --- | --- | --- | --- | --- | --- | --- | --- | --- | --- | --- | --- | --- | --- | --- | --- | --- | --- | --- | --- | --- | --- | --- | --- | --- | --- | --- | --- | --- |
| * = compared to TD-NGI group, p < 0.05 |
| ^ = compared to ASD-NGI group, p < 0.05 |

| Table 3. CD127-CD25+Foxp3+ (Tregs) Regulatory T cell Frequencies in children with ASD with or without GI symptoms [mean(SD)] | | | |
| --- | --- | --- | --- |
|  | **TD** | **ASD-NoGI** | **ASD-GI** |
| CD127-CD25+FoxP3+ | 4.5(1.35) | 4.8(1.56) | 4.6(2.10) |
| CD39+ Tregs | 51.7(29.6) | 33.3(37) | 20(14.8) |
| α4β7+CD39+ Tregs | 35.6(20.2) | 31(21) | 38.1(13.5) |
| TIGIT+ Tregs | 44.8(6.7) | 47.2(12.3) | 50.8(8.2) |
| α4β7+TIGIT+ Tregs | 54.9(7.9) | 55.4(14.3) | 59.5(15.5) |
| CD39+TIGIT+ Tregs | 36.7(22.2) | 31.7(37) | 12.3(6.7) |

|  | |
| --- | --- |
|  |

| Table 4. GITR, LAP, GARP in gut homing regulatory T cell (CD127-CD25+Foxp3+ Tregs) frequencies in children with ASD with or without GI symptoms [mean(SD)] | | | |
| --- | --- | --- | --- |
|  | **TD** | **ASD-NoGI** | **ASD-GI** |
| a4b7+ Tregs | 7.3(4.1) | 7.8(2.5) | **6.1(1.2)^** |
| CTLA-4+ Tregs | 12.2(6.6) | 12.9(6.8) | 16.5(15) |
| a4b7+ CTLA-4+Tregs | 14.3(8.6) | 15.2(5.8) | 18.7(16.8) |
| GITR+ Tregs | 54.8(18.1) | 47(16.4) | **34(14.5)*^** |
| a4b7+ GITR+ Tregs | 67.9(10) | 60.8(13) | **45(15)^*** |
| GARP+ Tregs | 50(19.4) | 35.7(14.3) | 39.8(16.1) |
| a4b7+ GARP+ Tregs | 53.5(13.3) | **38.8(15.4)*** | 42.5(19.6) |
| LAP+ Tregs | 45.5(20.2) | **29.6(13.6)*** | 28(13.8) |
| a4b7+ LAP+ Tregs | 42.6(22.7) | 32.1(17.8) | 32.2(15) |
| GARP+LAP+ Tregs | 39.7(22.2) | **23.7(13.5)*** | 24.6(14.1) |

|  |
| --- |
| ^ = compared to ASD-NoGI group, p < 0.05 |
| * = compared to TD group, p < 0.05 |

| | **Table 5.** Tregs cell phenotype and associations with behaviors | | --- | | | | | |
| --- | --- | --- | --- | --- | --- |
| Group | Cell | Behavior | Spearman | FDR P-Value |
| ASD-NoGI |  |  |  |  |
|  | Foxp3+a4β7+GARP+ | ABC Inappropriate Speech | -0.9384 | 0.0021 |
| TD |  |  |  |  |
|  | Foxp3+a4β7+ | MSEL Visual Reception | 0.8536 | 0.011 |
|  | Foxp3+a4β7+CD39+ | Vine socialization | 0.8488 | 0.012 |
|  | Foxp3+Lap+ | Vine Composite | -0.833 | 0.016 |
|  | Foxp3+Garp+LAP+ | Vine Daily Living | -0.7833 | 0.037 |
|  | Foxp3+a4β7+GARP+LAP+ | Vine Communication | 0.7833 | 0.037 |
|  | CD3+CD4+ | MSEL Visual Reception | 0.7078 | 0.044 |
|  | Foxp3+a4β7+CD39+TIGIT+ | Vine socialization | 0.7637 | 0.049 |
